# Supplementary material
Source: publisher figshare collection journal article supplement (https://diabetesjournals.figshare.com/articles/dataset/_/23799882)
Supplement: Supplementary file 1 [file 1]

## Online-Only Supplemental Material

### The TEDDY Study Group

**Colorado Clinical Center:** Marian Rewers, M.D., Ph.D., PI<sup>1,4,6,9,10</sup>, Kimberly Bautista<sup>11</sup>, Judith Baxter<sup>8,9,11</sup>, Daniel Felipe-Morales, Brigitte I. Frohnert, M.D., Ph.D.<sup>2,13</sup>, Marisa Stahl, M.D.<sup>12</sup>, Isabel Flores Garcia, Patricia Gesualdo<sup>2,6,11,13</sup>, Sierra Hays, Michelle Hoffman<sup>11,12,13</sup>, Rachel Karban<sup>11</sup>, Edwin Liu, M.D.<sup>12</sup>, Leila Loaiza, Jill Norris, Ph.D.<sup>2,3,11</sup>, Holly O'Donnell, Ph.D.<sup>8</sup>, Loana Thorndahl, Andrea Steck, M.D.<sup>3,13</sup>, Kathleen Waugh<sup>6,7,11</sup>. University of Colorado, Anschutz Medical Campus, Barbara Davis Center for Childhood Diabetes, Aurora, CO, USA.

**Finland Clinical Center:** Jorma Toppari, M.D., Ph.D., PI<sup>¥1,4,10,13</sup>, Olli G. Simell, M.D., Ph.D., Annika Adamsson, Ph.D.<sup>^11</sup>, Suvi Ahonen<sup>\*±§</sup>, Mari Åkerlund<sup>\*±§</sup>, Sirpa Anttila<sup>μ□</sup>, Leena Hakola<sup>\*±</sup>, Anne Hekkala, M.D.<sup>μ□</sup>, Tiia Honkanen<sup>μ□</sup>, Heikki Hyöty, M.D., Ph.D.<sup>\*±6</sup>, Jorma Ilonen, M.D., Ph.D.<sup>¥3</sup>, Sanna Jokipuu<sup>^</sup>, Taru Karjalainen<sup>μ□</sup>, Leena Karlsson<sup>^</sup>, Jukka Kero M.D., Ph.D.<sup>¥3, 13</sup>, Jaakko J. Koskeniemi M.D., Ph.D.<sup>¥^</sup>, Miia Kähönen<sup>μ□11,13</sup>, Mikael Knip, M.D., Ph.D.<sup>\*±</sup>, Minna-Liisa Koivikko<sup>μ□</sup>, Katja Kokkonen<sup>\*±</sup>, Merja Koskinen<sup>\*±</sup>, Mirva Koreasalo<sup>\*±§2</sup>, Kalle Kurppa, M.D., Ph.D.<sup>\*±12</sup>, Salla Kuusela, M.D.<sup>μ□</sup>, Jarita Kytölä<sup>\*±</sup>, Jutta Laiho, Ph.D.<sup>\*6</sup>, Tiina Latva-aho<sup>μ□</sup>, Siiri Leisku<sup>\*±</sup>, Laura Leppänen<sup>^</sup>, Katri Lindfors, Ph.D.<sup>\*12</sup>, Maria Lönnrot, M.D., Ph.D.<sup>\*±6</sup>, Elina Mäntymäki<sup>^</sup>, Markus Mattila<sup>\*±</sup>, Maija Miettinen<sup>§2</sup>, Teija Mykkänen<sup>μ□</sup>, Tiina Niininen<sup>\*±11</sup>, Sari Niinistö<sup>§2</sup>, Noora Nurminen<sup>\*±</sup>, Sami Oikarinen, Ph.D.<sup>\*±6</sup>, Hanna-Leena Oinas<sup>\*±</sup>, Paula Ollikainen<sup>μ□</sup>, Zhian Othmani<sup>¥</sup>, Sirpa Pohjola<sup>μ□</sup>, Solja Raja-Hanhela<sup>μ□</sup>, Jenna Rautanen<sup>±§</sup>, Anne Riikonen<sup>\*±§2</sup>, Minna Romo<sup>^</sup>, Juulia Rönkä<sup>μ□</sup>, Nelli Rönkä<sup>μ□</sup>, Satu Simell, M.D., Ph.D.<sup>¥12</sup>, Päivi Tossavainen, M.D.<sup>μ□</sup>, Mari Vähä-Mäkilä<sup>¥</sup>, Eeva Varjonen<sup>^11</sup>, Riitta Veijola, M.D., Ph.D.<sup>μ□13</sup>, Irene Viinikangas<sup>μ□</sup>, Silja Vilmi<sup>μ□</sup>, Suvi M. Virtanen, M.D., Ph.D.<sup>\*±§2</sup>. <sup>¥</sup>University of Turku, Turku, Finland, <sup>\*</sup>Tampere University, Tampere, Finland, <sup>^</sup>University of Oulu, Oulu, Finland, <sup>^</sup>Turku University Hospital, Hospital District of Southwest Finland, Turku, Finland, <sup>±</sup>Tampere University Hospital, Tampere, Finland, <sup>□</sup>Oulu University Hospital, Oulu, Finland, <sup>§</sup>Finnish Institute for Health and Welfare, Helsinki, Finland.

**Georgia/Florida Clinical Center:** Richard McIndoe, Ph.D., PI<sup>^4,10</sup>, Desmond Schatz, M.D.<sup>\*4,7,8</sup>, Diane Hopkins<sup>^11</sup>, Michael Haller, M.D.<sup>\*13</sup>, Risa Bernard<sup>^11</sup>, Melissa Gardiner<sup>^11</sup>, Ashok Sharma, Ph.D.<sup>^</sup>, Laura Jacobsen, M.D.<sup>\*13</sup>, Jennifer Hosford<sup>^</sup>, Kennedy Petty<sup>^</sup>, Leah Myers<sup>^</sup>, Chelsea Salmon<sup>\*^</sup>. <sup>^</sup>Center for Biotechnology and Genomic Medicine, Augusta University, Augusta, GA, USA. <sup>\*</sup>University of Florida, Pediatric Endocrinology, Gainesville, FL, USA.

**Germany Clinical Center:** Anette G. Ziegler, M.D., PI<sup>1,3,4,10</sup>, Ezio Bonifacio Ph.D.<sup>\*</sup>, Cigdem Gezginici, Willi Grätz, Anja Heublein, Eva Hohoff<sup>¥2</sup>, Sandra Hummel, Ph.D.<sup>2</sup>, Annette Knopff<sup>7</sup>, Melanie Köger, Sibylle Koletzko, M.D.<sup>112</sup>, Claudia Ramminger<sup>11</sup>, Roswith Roth, Ph.D.<sup>8</sup>, Jennifer Schmidt, Marlon Scholz, Joanna Stock<sup>8,11,13</sup>, Katharina Warncke, M.D.<sup>13</sup>, Lorena Wendel, Christiane Winkler, Ph.D.<sup>2,11</sup>. Forschergruppe Diabetes e.V. and Institute of Diabetes Research, Helmholtz Zentrum München, Forschergruppe Diabetes, and Klinikum rechts der Isar, Technische Universität München, Neuherberg, Germany. <sup>\*</sup>Center for Regenerative Therapies, TU Dresden, Dresden, Germany, <sup>1</sup>Dr. von Hauner Children's Hospital, Department of Gastroenterology, Ludwig Maximilians University Munich, Munich, Germany, <sup>¥</sup>University of Bonn, Department of Nutritional Epidemiology, Bonn, Germany.

**Sweden Clinical Center:** Åke Lernmark, Ph.D., PI<sup>1,3,4,5,6,8,9,10</sup>, Daniel Agardh, M.D., Ph.D.<sup>6,12</sup>, Carin Andrén Aronsson, Ph.D.<sup>2,11,12</sup>, Rasmus Bennet, Corrado Cilio, Ph.D., M.D.<sup>6</sup>, Susanne Dahlberg, Ulla Fält, Malin Goldman Tsubarah, Emelie Ericson-Hallström, Lina Fransson, Emina Halilovic, Gunilla Holmén, Susanne Hyberg, Berglind Jonsdottir, M.D., Ph.D.<sup>11</sup>, Naghmeh Karimi, Helena Elding Larsson, M.D., Ph.D.<sup>6,13</sup>, Marielle Lindström, Markus Lundgren, M.D., Ph.D.<sup>13</sup>, Marlena Maziarz, Ph.D., Jessica Melin<sup>11</sup>, Caroline Nilsson, Kobra Rahmati, Anita Ramelius, Falastin Salami, Ph.D., Anette Sjöberg, Evelyn Tekum Amboh, Carina Törn, Ph.D.<sup>3</sup>, Ulrika Ulvenhag, Terese Wiktorsson, Åsa Wimar<sup>13</sup>. Lund University, Lund, Sweden.

**Washington Clinical Center:** William A. Hagopian, M.D., Ph.D., PI<sup>1,3,4,6,7,10,12,13</sup>, Michael Killian<sup>6,7,11,12</sup>, Claire Cowen Crouch<sup>11,13</sup>, Jennifer Skidmore<sup>2</sup>, Trevor Bender, Megan Llewellyn, Cody McCall, Arlene Meyer, Jocelyn Meyer, Denise Mulenga<sup>11</sup>, Nole Powell, Jared Radtke, Shreya Roy, Preston Tucker. Pacific Northwest Research Institute, Seattle, WA, USA.

**Pennsylvania Satellite Center:** Dorothy Becker, M.D., Margaret Franciscus, MaryEllen Dalmagro-Elias Smith<sup>2</sup>, Ashi Daftary, M.D., Mary Beth Klein, Chrystal Yates. Children's Hospital of Pittsburgh of UPMC, Pittsburgh, PA, USA.

**Data Coordinating Center:** Jeffrey P. Krischer, Ph.D., PI<sup>1,4,5,9,10</sup>, Rajesh Adusumali, Sarah Austin-Gonzalez, Maryouri Avendano, Sandra Baethke, Brant Burkhardt, Ph.D.<sup>6</sup>, Martha Butterworth<sup>2</sup>, Nicholas Cadigan, Joanna Clasen, Ph.D., Kevin Counts, Laura Gandolfo, Jennifer Garmeson, Veena Gowda, Christina Karges, Shu Liu, Xiang Liu, Ph.D.<sup>2,3,8,13</sup>, Kristian Lynch, Ph.D.<sup>6,8</sup>, Jamie Malloy, Lazarus Mramba, Ph.D.<sup>2</sup>, Cristina McCarthy<sup>11</sup>, Jose Moreno, Hemang M. Parikh, Ph.D.<sup>3,8</sup>, Cassandra Remedios, Chris Shaffer, Susan Smith<sup>11</sup>, Noah Sulman, Ph.D., Roy Tamura, Ph.D.<sup>1,2,11,12,13</sup>, Dena Tewey, Henri Thuma, Michael Toth, Ulla Uusitalo, Ph.D.<sup>2</sup>, Kendra Vehik, Ph.D.<sup>4,5,6,8,13</sup>, Ponni Vijayakandipan, Melissa Wroble, Jimin Yang, Ph.D., R.D.<sup>2</sup>, Kenneth Young, Ph.D. *Past staff: Michael Abbondandolo, Lori Ballard, Rasheedah Brown, David Cuthbertson, Stephen Dankyi, Christopher Eberhard, Steven Fiske, David Hadley, Ph.D., Kathleen Heyman, Belinda Hsiao, Francisco Perez Laras, Hye-Seung Lee, Ph.D., Qian Li, Ph.D., Colleen Maguire, Wendy McLeod, Aubrie Merrell, Steven Meulemans, Ryan Quigley, Laura Smith, Ph.D.* University of South Florida, Tampa, FL, USA.

**Autoantibody Reference Laboratories:** Liping Yu, M.D.<sup>^5</sup>, Dongmei Miao, M.D.<sup>^</sup>, Kathleen Gillespie<sup>\*3</sup>, Kyla Chandler<sup>\*</sup>, Ilana Kelland<sup>\*</sup>, Yassin Ben Khoud<sup>\*</sup>, Matthew Randell <sup>\*</sup>. <sup>^</sup>Barbara Davis Center for Childhood Diabetes, University of Colorado Denver, <sup>\*</sup>Bristol Medical School, University of Bristol, UK.

**HLA Reference Laboratory:** William Hagopian<sup>3</sup>, M.D., Ph.D., Jared Radtke, Preston Tucker. Pacific Northwest Research Institute, Seattle, WA, USA. (Previously Henry Erlich, Ph.D.<sup>3</sup>, Steven J. Mack, Ph.D., Anna Lisa Fear. Center for Genetics, Children's Hospital Oakland Research Institute.)

**Repository:** Chris Deigan. NIDDK Biosample Repository at Fisher BioServices, Rockville, MD, USA. (Previously Ricky Schrock, Polina Malone, Sandra Ke, Niveen Mulholland, Ph.D.)

**Project scientist:** Beena Akolkar, Ph.D.<sup>1,3,4,5,6,7,9,10</sup>. National Institutes of Diabetes and Digestive and Kidney Diseases, Bethesda, MD, USA.

**Other contributors:** Thomas Briesse, Ph.D.<sup>6</sup>, Columbia University, New York, NY, USA. Todd Brusko, Ph.D.<sup>5</sup>, University of Florida, Gainesville, FL, USA. Teresa Buckner, Ph.D.<sup>2</sup>, University of Northern Colorado, Greeley, CO, USA. Suzanne Bennett Johnson, Ph.D.<sup>8,11</sup>, Florida State University, Tallahassee, FL, USA. Eoin McKinney, Ph.D.<sup>5</sup>, University of Cambridge, Cambridge, UK. Tomi Pastinen, M.D., Ph.D.<sup>5</sup>, The Children's Mercy Hospital, Kansas City, MO, USA. Steffen Ullitz Thorsen, M.D., Ph.D.<sup>2</sup>, Department of Clinical Immunology, University of Copenhagen, Copenhagen, Denmark, and Department of Pediatrics and Adolescents, Copenhagen University Hospital, Herlev, Denmark. Eric Triplett, Ph.D.<sup>6</sup>, University of Florida, Gainesville, FL, USA.

#### **Committees:**

<sup>1</sup>Ancillary Studies, <sup>2</sup>Diet, <sup>3</sup>Genetics, <sup>4</sup>Human Subjects/Publicity/Publications, <sup>5</sup>Immune Markers, <sup>6</sup>Infectious Agents, <sup>7</sup>Laboratory Implementation, <sup>8</sup>Psychosocial, <sup>9</sup>Quality Assurance, <sup>10</sup>Steering, <sup>11</sup>Study Coordinators, <sup>12</sup>Celiac Disease, <sup>13</sup>Clinical Implementation.

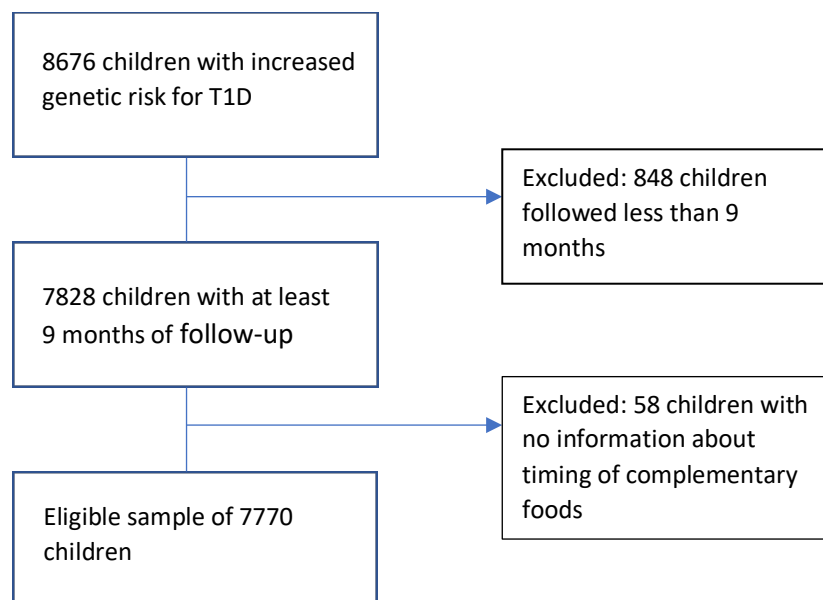

Supplemental Figure S1. Study population

Supplemental Table S2. Population characteristics, high-risk HLA genotype, and timing of probiotic exposure in association with islet autoimmunity

|                                                 |      | Any IA (n= 850) |                      |       | IAA first (n=311 ) |                      |        | GADA first (n=378 ) |                      |       | Multiple AAB (n=490 ) |                      |       |
|-------------------------------------------------|------|-----------------|----------------------|-------|--------------------|----------------------|--------|---------------------|----------------------|-------|-----------------------|----------------------|-------|
| Country                                         | N    | n(%)            | HR (95%CI)           | p     | n(%)               | HR (95%CI)           | p      | n(%)                | HR (95%CI)           | p     | n(%)                  | HR (95%CI)           | p     |
| <b>-Finland</b>                                 | 1697 | 208<br>(12.3)   | 1.37 (1.12,1.67)     | 0.002 | 98<br>(5.8)        | 2.07<br>(1.51,2.82)  | <0.001 | 72 (4.2)            | 0.90 (0.65,<br>1.23) | 0.491 | 130<br>(7.7)          | 1.51 (1.16,<br>1.95) | 0.002 |
| <b>-Germany</b>                                 | 532  | 60<br>(11.3)    | 1.13 (0.84,1.52)     | 0.419 | 20<br>(3.8)        | 1.09<br>(0.66,1.80)  | 0.749  | 19 (3.6)            | 0.73 (1.00,<br>1.59) | 0.215 | 42<br>(7.9)           | 1.23 (0.86,<br>1.77) | 0.254 |
| <b>-Sweden</b>                                  | 2329 | 292<br>(12.5)   | 1.31 (1.11,1.54)     | 0.002 | 95<br>(4.1)        | 1.32<br>(0.99,1.75)  | 0.059  | 144<br>(6.2)        | 1.26 (1.00,<br>1.59) | 0.054 | 152<br>(6.5)          | 1.22 (0.98,<br>1.52) | 0.083 |
| <b>-U.S.</b>                                    | 3212 | 290<br>(9.0)    | 1                    |       | 98<br>(3.1)        | 1                    |        | 143<br>(4.5)        | 1                    |       | 166<br>(5.2)          | 1                    |       |
| <b>First-degree<br/>relative<br/>with T1D</b>   |      |                 |                      |       |                    |                      |        |                     |                      |       |                       |                      |       |
| <b>-Yes</b>                                     | 897  | 168<br>(18.7)   | 1.59 (1.39,<br>1.82) | <.001 | 68<br>(7.6)        | 1.53 (1.22,<br>1.91) | <.001  | 67 (7.5)            | 1.60 (1.31,<br>1.96) | <.001 | 114<br>(12.7)         | 2.01 (1.68,<br>2.41) | <.001 |
| <b>-No</b>                                      | 6873 | 682<br>(9.9)    | 1                    |       | 243<br>(3.5)       | 1                    |        | 311<br>(4.5)        | 1                    |       | 376<br>(5.5)          | 1                    |       |
| <b>Sex of the<br/>child</b>                     |      |                 |                      |       |                    |                      |        |                     |                      |       |                       |                      |       |
| <b>-Female</b>                                  | 3805 | 383<br>(10.1)   | 0.84 (0.73,0.96)     | 0.010 | 139<br>(3.7)       | 0.82 (0.66,<br>1.03) | 0.087  | 174<br>(4.6)        | 0.87 (0.71,<br>1.07) | 0.178 | 218<br>(5.7)          | 0.82 (0.68,<br>0.98) | 0.026 |
| <b>-Male</b>                                    | 3965 | 467<br>(11.8)   | 1                    |       | 172<br>(4.3)       | 1                    |        | 204<br>(5.2)        | 1                    |       | 272<br>(6.9)          | 1                    |       |
| <b>HLA DR3/4</b>                                |      |                 |                      |       |                    |                      |        |                     |                      |       |                       |                      |       |
| <b>-Yes</b>                                     | 3042 | 414<br>(13.6)   | 2.04 (1.71,<br>2.44) | <.001 | 146<br>(4.8)       | 2.40 (1.82,<br>3.18) | <.001  | 187<br>(6.2)        | 1.85 (1.41,<br>2.43) | <.001 | 265<br>(8.7)          | 2.52 (2.02,<br>3.14) | <.001 |
| <b>-No</b>                                      | 4728 | 436<br>(9.2)    | 1                    |       | 165<br>(3.5)       | 1                    |        | 191<br>(4.0)        | 1                    |       | 225<br>(4.8)          | 1                    |       |
| <b>Probiotic,<br/>age at first<br/>exposure</b> |      |                 |                      |       |                    |                      |        |                     |                      |       |                       |                      |       |
| <b>≤52 weeks</b>                                | 1712 | 197<br>(11.5)   | 0.94 (0.78,<br>1.12) | 0.481 | 75<br>(4.4)        | 0.83 (0.62,<br>1.11) | 0.215  | 81 (4.7)            | 1.04 (0.79,<br>1.38) | 0.777 | 127<br>(7.4)          | 1.02 (0.81,<br>1.28) | 0.877 |
| <b>&gt;52 weeks,<br/>or never</b>               | 6058 | 653<br>(10.8)   | 1                    |       | 236<br>(3.9)       | 1                    |        | 297<br>(4.9)        | 1                    |       | 363<br>(6.0)          | 1                    |       |

AAB: autoantibodies

Supplemental Table S3. Duration of breastfeeding or timing of introduction of complementary foods and risk of any IA

| Food exposure                                         | Timing in months | Developed IA N (%) | Did not develop IA N (%) | Missing | Adjusted HR* HR (95% CI) | p            |
|-------------------------------------------------------|------------------|--------------------|--------------------------|---------|--------------------------|--------------|
| Exclusive breastfeeding                               | <4               | 664 (10.9)         | 5407 (89.1)              | 252     | 1.00 (0.85, 1.19)        | 0.984        |
|                                                       | >=4              | 172 (11.9)         | 1275 (88.1)              |         | 1                        |              |
| Any breastfeeding                                     | <4               | 193 (9.5)          | 1843 (90.5)              | 321     | 0.92 (0.78, 1.08)        | 0.325        |
|                                                       | >=4              | 639 (11.8)         | 4774 (88.2)              |         | 1                        |              |
| Any infant formula                                    | <4               | 628 (10.7)         | 5239 (89.3)              | 969     | 0.99 (0.75, 1.30)        | 0.928        |
|                                                       | 4-<6             | 46 (10.9)          | 377 (89.1)               |         | 0.92 (0.62, 1.36)        | 0.688        |
|                                                       | >=6              | 58 (11.4)          | 453 (88.6)               |         | 1                        |              |
| Any solid foods                                       | <4               | 304 (10.0)         | 2728 (90.0)              | 0       | 1.09 (0.85, 1.40)        | 0.504        |
|                                                       | 4-<6             | 462 (11.8)         | 3459 (88.2)              |         | 1.18 (0.92, 1.50)        | 0.193        |
|                                                       | >=6              | 84 (10.3)          | 733 (89.7)               |         | 1                        |              |
| Cereals                                               | <4               | 170 (9.1)          | 1693 (90.9)              | 24      | 0.94 (0.75, 1.19)        | 0.606        |
|                                                       | 4-<6             | 535 (11.8)         | 4016 (88.2)              |         | 1.10 (0.90, 1.34)        | 0.354        |
|                                                       | >=6              | 144 (10.8)         | 1188 (89.2)              |         | 1                        |              |
| Gluten containing cereals                             | <4               | 36 (7.1)           | 471 (92.9)               | 134     | <b>0.64 (0.46, 0.91)</b> | <b>0.013</b> |
|                                                       | 4-<6             | 322 (12.0)         | 2359 (88.0)              |         | 0.99 (0.84, 1.16)        | 0.892        |
|                                                       | >=6              | 489 (11.0)         | 3959 (89.0)              |         | 1                        |              |
| Cereals not containing gluten                         | <4               | 162 (9.3)          | 1579 (90.7)              | 29      | 0.94 (0.74, 1.18)        | 0.574        |
|                                                       | 4-<6             | 531 (11.6)         | 4058 (52.4)              |         | 1.05 (0.87, 1.28)        | 0.596        |
|                                                       | >=6              | 156 (11.1)         | 1255 (88.9)              |         | 1                        |              |
| Fruit & berries                                       | <4               | 153 (8.8)          | 1590 (91.2)              | 37      | 0.85 (0.68, 1.05)        | 0.121        |
|                                                       | 4-<6             | 478 (11.8)         | 3587 (88.2)              |         | 1.02 (0.86, 1.21)        | 0.838        |
|                                                       | >=6              | 216 (11.2)         | 1709 (88.8)              |         | 1                        |              |
| Root vegetables                                       | <4               | 151 (10.1)         | 1345 (89.9)              | 40      | 0.92 (0.73, 1.16)        | 0.475        |
|                                                       | 4-<6             | 502 (11.5)         | 3877 (88.5)              |         | 0.99 (0.83, 1.19)        | 0.950        |
|                                                       | >=6              | 196 (10.6)         | 1659 (89.4)              |         | 1                        |              |
| Other vegetables than roots                           | <4               | 50 (9.5)           | 475 (90.5)               | 72      | 0.96 (0.71, 1.29)        | 0.778        |
|                                                       | 4-<6             | 471 (11.2)         | 3721 (88.8)              |         | 0.99 (0.85, 1.15)        | 0.888        |
|                                                       | >=6              | 326 (10.9)         | 2655 (89.1)              |         | 1                        |              |
| Regular cow's milk                                    | <4               | 29 (6.9)           | 392 (93.1)               | 398     | 0.70 (0.48, 1.01)        | 0.058        |
|                                                       | 4-<6             | 79 (10.6)          | 668 (89.4)               |         | 0.91 (0.72, 1.15)        | 0.424        |
|                                                       | >=6              | 717 (11.6)         | 5487 (88.4)              |         | 1                        |              |
| Meat (including all meat, poultry, fish, and seafood) | <4               | 8 (7.6)            | 97 (92.4)                | 146     | 0.79 (0.39, 1.59)        | 0.508        |
|                                                       | 4-<6             | 313 (11.6)         | 2392 (88.4)              |         | 0.97 (0.82, 1.14)        | 0.714        |
|                                                       | >=6              | 523 (10.9)         | 4291 (89.1)              |         | 1                        |              |
| Egg                                                   | <=9              | 568 (11.1)         | 4550 (88.9)              | 413     | 1.00 (0.86, 1.16)        | 0.946        |
|                                                       | >9               | 261 (11.7)         | 1978 (88.3)              |         | 1                        |              |

\*Adjusted for country, first degree family member with type 1 diabetes (FDR)- status, sex of the child, high-risk genotype (HLA DR3/4), probiotic exposure during the first year of life (52 weeks)

Supplemental Table S4. Duration of breastfeeding or timing of introduction of complementary foods and risk of IAA first

| Food exposure                               | Timing in months | Developed IA N (%) | Did not develop IA N (%) | Missing | Adjusted HR* HR (95% CI) | p     |
|---------------------------------------------|------------------|--------------------|--------------------------|---------|--------------------------|-------|
| Exclusive breastfeeding                     | <4               | 243 (4.0)          | 5828 (96.0)              | 252     | 0.97 (0.74, 1.28)        | 0.829 |
|                                             | >=4              | 65 (4.5)           | 1382 (95.5)              |         | 1                        |       |
| Any breastfeeding                           | <4               | 70 (3.4)           | 1966 (96.6)              | 321     | 0.89 (0.68, 1.16)        | 0.396 |
|                                             | >=4              | 237 (4.4)          | 5176 (95.6)              |         | 1                        |       |
| Any infant formula                          | <4               | 228 (3.9)          | 5639 (96.1)              | 969     | 0.88 (0.58, 1.35)        | 0.559 |
|                                             | 4-<6             | 18 (4.3)           | 405 (95.7)               |         | 0.89 (0.49, 1.65)        | 0.718 |
|                                             | >=6              | 25 (4.9)           | 486 (95.1)               |         | 1                        |       |
| Any solid foods                             | <4               | 116 (3.8)          | 2916 (96.2)              | 0       | 1.26 (0.82, 1.94)        | 0.302 |
|                                             | 4-<6             | 168 (4.3)          | 3753 (95.7)              |         | 1.32 (0.87, 2.02)        | 0.192 |
|                                             | >=6              | 27 (3.3)           | 790 (96.7)               |         | 1                        |       |
| Cereals                                     | <4               | 65 (3.5)           | 1798 (96.5)              | 24      | 1.03 (0.70, 1.50)        | 0.900 |
|                                             | 4-<6             | 195 (4.3)          | 4356 (95.7)              |         | 1.15 (0.83, 1.60)        | 0.389 |
|                                             | >=6              | 51 (3.8)           | 1281 (96.2)              |         | 1                        |       |
| Gluten containing cereals                   | <4               | 14 (2.8)           | 493 (97.2)               | 134     | 0.69 (0.39, 1.20)        | 0.188 |
|                                             | 4-<6             | 110 (4.1)          | 2571 (95.9)              |         | 0.90 (0.69, 1.18)        | 0.455 |
|                                             | >=6              | 186 (4.2)          | 4262 (95.8)              |         | 1                        |       |
| Cereals not containing gluten               | <4               | 61 (3.5)           | 1680 (96.5)              | 29      | 0.97 (0.67, 1.41)        | 0.868 |
|                                             | 4-<6             | 193 (4.2)          | 4396 (95.8)              |         | 1.06 (0.78, 1.46)        | 0.703 |
|                                             | >=6              | 57 (4.0)           | 1354 (96.0)              |         | 1                        |       |
| Fruit & berries                             | <4               | 58 (3.3)           | 1685 (96.7)              | 37      | 0.93 (0.65, 1.33)        | 0.680 |
|                                             | 4-<6             | 181 (4.5)          | 3884 (95.5)              |         | 1.15 (0.86, 1.54)        | 0.339 |
|                                             | >=6              | 71 (3.7)           | 1854 (96.3)              |         | 1                        |       |
| Root vegetables                             | <4               | 63 (4.2)           | 1433 (95.8)              | 40      | 1.03 (0.71, 1.50)        | 0.876 |
|                                             | 4-<6             | 180 (4.1)          | 4199 (95.9)              |         | 1.00 (0.74, 1.36)        | 0.992 |
|                                             | >=6              | 68 (3.7)           | 1787 (96.3)              |         | 1                        |       |
| Other vegetables than roots                 | <4               | 17 (3.2)           | 508 (96.8)               | 72      | 0.87 (0.52, 1.45)        | 0.597 |
|                                             | 4-<6             | 174 (4.2)          | 4018 (95.8)              |         | 1.00 (0.78, 1.27)        | 0.973 |
|                                             | >=6              | 119 (4.0)          | 2862 (96.0)              |         | 1                        |       |
| Regular cow's milk                          | <4               | 8 (1.9)            | 413 (98.1)               | 398     | 0.55 (0.27, 1.11)        | 0.097 |
|                                             | 4-<6             | 28 (3.8)           | 719 (96.2)               |         | 0.92 (0.62, 1.37)        | 0.697 |
|                                             | >=6              | 262 (4.2)          | 5942 (95.8)              |         | 1                        |       |
| Meat (including poultry, fish, and seafood) | <4               | 2 (1.9)            | 103 (98.1)               | 146     | 0.54 (0.14, 2.20)        | 0.393 |
|                                             | 4-<6             | 109 (4.0)          | 2596 (96.0)              |         | 0.86 (0.66, 1.12)        | 0.253 |
|                                             | >=6              | 198 (4.1)          | 4616 (95.9)              |         | 1                        |       |
| Egg                                         | <=9              | 204 (4.0)          | 4914 (96.0)              | 413     | 0.94 (0.74, 1.21)        | 0.636 |
|                                             | >9               | 101 (4.5)          | 2138 (95.5)              |         | 1                        |       |

\*Adjusted for country, first degree family member with type 1 diabetes (FDR)- status, sex of the child, high-risk genotype (HLA DR3/4), probiotic exposure during the first year of life (52 weeks)

Supplemental Table S5. Duration of breastfeeding or timing of introduction of complementary foods and risk of GADA first

| Food exposure                                         | Timing in months | Developed IA N (%) | Did not develop IA N (%) | Missing N | Adjusted HR* HR (95% CI) | p            |
|-------------------------------------------------------|------------------|--------------------|--------------------------|-----------|--------------------------|--------------|
| Exclusive breastfeeding                               | <4               | 298 (4.9)          | 5773 (95.1)              | 252       | 1.04 (0.81, 1.35)        | 0.760        |
|                                                       | >=4              | 73 (5.0)           | 1374 (95.0)              |           | 1                        |              |
| Any breastfeeding                                     | <4               | 75 (3.7)           | 1961 (96.3)              | 321       | 0.78 (0.61, 1.01)        | 0.061        |
|                                                       | >=4              | 294 (5.4)          | 5119 (94.6)              |           | 1                        |              |
| Any infant formula                                    | <4               | 279 (4.8)          | 5588 (95.2)              | 969       | 0.85 (0.57, 1.27)        | 0.422        |
|                                                       | 4-<6             | 24 (5.7)           | 399 (94.3)               |           | 0.93 (0.53, 1.62)        | 0.798        |
|                                                       | >=6              | 27 (5.3)           | 484 (94.7)               |           | 1                        |              |
| Any solid foods                                       | <4               | 123 (4.1)          | 2909 (95.9)              | 0         | 0.99 (0.68, 1.46)        | 0.963        |
|                                                       | 4-<6             | 219 (5.6)          | 3702 (94.4)              |           | 1.24 (0.86, 1.79)        | 0.256        |
|                                                       | >=6              | 36 (4.4)           | 781 (95.6)               |           | 1                        |              |
| Cereals                                               | <4               | 65 (3.5)           | 1798 (96.5)              | 24        | 0.85 (0.59, 1.22)        | 0.368        |
|                                                       | 4-<6             | 255 (5.6)          | 4296 (94.4)              |           | 1.23 (0.91, 1.67)        | 0.186        |
|                                                       | >=6              | 57 (4.3)           | 1275 (95.7)              |           | 1                        |              |
| Gluten containing cereals                             | <4               | 13 (2.6)           | 494 (97.4)               | 134       | <b>0.53 (0.30, 0.95)</b> | <b>0.031</b> |
|                                                       | 4-<6             | 157 (5.9)          | 2524 (94.1)              |           | 1.12 (0.88, 1.42)        | 0.375        |
|                                                       | >=6              | 207 (4.7)          | 4241 (95.3)              |           | 1                        |              |
| Cereals not containing gluten                         | <4               | 62 (3.6)           | 1679 (96.4)              | 29        | 0.87 (0.60, 1.25)        | 0.446        |
|                                                       | 4-<6             | 255 (5.6)          | 4334 (94.4)              |           | 1.23 (0.91, 1.66)        | 0.178        |
|                                                       | >=6              | 60 (4.3)           | 1351 (95.7)              |           | 1                        |              |
| Fruit & berries                                       | <4               | 62 (3.6)           | 1681 (96.4)              | 37        | 0.75 (0.54, 1.04)        | 0.089        |
|                                                       | 4-<6             | 216 (5.3)          | 3849 (94.7)              |           | 0.99 (0.77, 1.28)        | 0.965        |
|                                                       | >=6              | 99 (5.1)           | 1826 (94.9)              |           | 1                        |              |
| Root vegetables                                       | <4               | 54 (3.6)           | 1442 (96.4)              | 40        | 0.77 (0.53, 1.11)        | 0.164        |
|                                                       | 4-<6             | 236 (5.4)          | 4143 (94.6)              |           | 1.05 (0.80, 1.38)        | 0.724        |
|                                                       | >=6              | 88 (4.7)           | 1767 (95.3)              |           | 1                        |              |
| Other vegetables than roots                           | <4               | 18 (3.4)           | 507 (96.6)               | 72        | 0.82 (0.50, 1.34)        | 0.430        |
|                                                       | 4-<6             | 220 (5.3)          | 3972 (94.7)              |           | 1.07 (0.86, 1.34)        | 0.547        |
|                                                       | >=6              | 139 (4.7)          | 2842 (95.3)              |           | 1                        |              |
| Regular cow's milk                                    | <4               | 11 (2.6)           | 410 (97.4)               | 398       | 0.55 (0.30, 1.01)        | 0.053        |
|                                                       | 4-<6             | 38 (5.1)           | 709 (94.9)               |           | 0.92 (0.66, 1.30)        | 0.648        |
|                                                       | >=6              | 323 (5.2)          | 5881 (94.8)              |           | 1                        |              |
| Meat (including all meat, poultry, fish, and seafood) | <4               | 2 (1.9)            | 103 (98.1)               | 146       | 0.46 (0.12, 1.86)        | 0.278        |
|                                                       | 4-<6             | 146 (5.4)          | 2559 (94.6)              |           | 1.09 (0.85, 1.40)        | 0.488        |
|                                                       | >=6              | 228 (4.7)          | 4586 (95.3)              |           | 1                        |              |
| Egg                                                   | <=9              | 262 (5.1)          | 4856 (94.9)              | 413       | 1.05 (0.83, 1.32)        | 0.696        |
|                                                       | >9               | 108 (4.8)          | 2131 (95.2)              |           | 1                        |              |

\*Adjusted for country, first degree family member with type 1 diabetes (FDR)- status, sex of the child, high-risk genotype (HLA DR3/4), probiotic exposure during the first year of life (52 weeks)

Supplemental Table S6. Duration of breastfeeding or timing of introduction of complementary foods and risk of multiple autoantibodies

| Food exposure                               | Timing in months | Developed IA N (%) | Did not develop IA N (%) | Missing N | Adjusted HR* HR (95% CI) | p            |
|---------------------------------------------|------------------|--------------------|--------------------------|-----------|--------------------------|--------------|
| Exclusive breastfeeding                     | <4               | 380 (6.3)          | 5691 (93.7)              | 252       | 0.97 (0.78, 1.21)        | 0.807        |
|                                             | >=4              | 101 (7.0)          | 1346 (93.0)              |           | 1                        |              |
| Any breastfeeding                           | <4               | 115 (5.7)          | 1921 (94.3)              | 321       | 0.94 (0.77, 1.17)        | 0.593        |
|                                             | >=4              | 363 (6.7)          | 5050 (93.3)              |           | 1                        |              |
| Any infant formula                          | <4               | 366 (6.2)          | 5501 (93.8)              | 969       | 1.01 (0.71, 1.44)        | 0.949        |
|                                             | 4-<6             | 21 (5.0)           | 402 (95.0)               |           | 0.75 (0.44, 1.29)        | 0.300        |
|                                             | >=6              | 35 (6.9)           | 476 (93.1)               |           | 1                        |              |
| Any solid foods                             | <4               | 168 (5.5)          | 2864 (94.5)              | 0         | 1.06 (0.76, 1.46)        | 0.744        |
|                                             | 4-<6             | 271 (6.9)          | 3650 (93.1)              |           | 1.23 (0.90, 1.68)        | 0.195        |
|                                             | >=6              | 51 (6.2)           | 766 (93.8)               |           | 1                        |              |
| Cereals                                     | <4               | 93 (5.0)           | 1770 (95.0)              | 24        | 0.86 (0.63, 1.16)        | 0.316        |
|                                             | 4-<6             | 306 (6.7)          | 4245 (93.3)              |           | 1.07 (0.84, 1.38)        | 0.582        |
|                                             | >=6              | 91 (6.8)           | 1241 (93.2)              |           | 1                        |              |
| Gluten containing cereals                   | <4               | 15 (3.0)           | 492 (97.0)               | 134       | <b>0.47 (0.28, 0.80)</b> | <b>0.005</b> |
|                                             | 4-<6             | 180 (6.7)          | 2501 (93.3)              |           | 0.97 (0.78, 1.20)        | 0.760        |
|                                             | >=6              | 294 (6.6)          | 4154 (93.4)              |           | 1                        |              |
| Cereals not containing gluten               | <4               | 89 (5.1)           | 1652 (94.9)              | 86        | 0.88 (0.65, 1.20)        | 0.420        |
|                                             | 4-<6             | 305 (6.7)          | 4284 (93.4)              |           | 1.07 (0.83, 1.37)        | 0.608        |
|                                             | >=6              | 96 (6.8)           | 1315 (93.2)              |           | 1                        |              |
| Fruit & berries                             | <4               | 87 (5.0)           | 1656 (95.0)              | 94        | 0.81 (0.61, 1.06)        | 0.128        |
|                                             | 4-<6             | 271 (6.7)          | 3794 (93.3)              |           | 0.99 (0.79, 1.24)        | 0.920        |
|                                             | >=6              | 131 (6.8)          | 1794 (93.2)              |           | 1                        |              |
| Root vegetables                             | <4               | 82 (5.5)           | 1414 (94.5)              | 97        | 0.85 (0.62, 1.15)        | 0.282        |
|                                             | 4-<6             | 289 (6.6)          | 4090 (93.4)              |           | 0.98 (0.78, 1.25)        | 0.892        |
|                                             | >=6              | 118 (6.4)          | 1737 (93.6)              |           | 1                        |              |
| Other vegetables than roots                 | <4               | 26 (5.0)           | 499 (95.0)               | 129       | 0.83 (0.55, 1.25)        | 0.374        |
|                                             | 4-<6             | 265 (6.3)          | 3927 (93.7)              |           | 0.95 (0.78, 1.15)        | 0.594        |
|                                             | >=6              | 198 (6.6)          | 2783 (93.4)              |           | 1                        |              |
| Regular cow's milk                          | <4               | 19 (4.5)           | 402 (95.5)               | 398       | 0.82 (0.52, 1.31)        | 0.410        |
|                                             | 4-<6             | 41 (5.5)           | 706 (94.5)               |           | 0.84 (0.61, 1.17)        | 0.309        |
|                                             | >=6              | 415 (6.7)          | 5789 (93.3)              |           | 1                        |              |
| Meat (including poultry, fish, and seafood) | <4               | 5 (4.8)            | 100 (95.2)               | 203       | 0.80 (0.33, 1.94)        | 0.619        |
|                                             | 4-<6             | 175 (6.5)          | 2530 (93.5)              |           | 0.97 (0.78, 1.20)        | 0.742        |
|                                             | >=6              | 306 (6.4)          | 4508 (93.6)              |           | 1                        |              |
| Egg                                         | <=9              | 311 (6.1)          | 4807 (93.9)              | 413       | 0.89 (0.74, 1.09)        | 0.255        |
|                                             | >9               | 167 (7.5)          | 2072 (92.5)              |           | 1                        |              |

\*Adjusted for country, first degree family member with type 1 diabetes (FDR)- status, sex of the child, high-risk genotype (HLA DR3/4), probiotic exposure during the first year of life (52 weeks)



Supplemental table S7. Timing of introduction of selected complementary foods and risk of developing any IA by HLA genotype and by use of probiotics during the first 52 weeks of life.

| Food exposure                    | N<br>(Miss<br>ig) | n<br>affe<br>cted | No HLA DR3/4<br>No probiotic exposure | N<br>(Missi<br>g) | n<br>aff<br>ected | No HLA DR3/4<br>Probiotic exposure | N<br>(Missi<br>g) | n<br>affec<br>ted | HLA DR3/4<br>No probiotic exposure | N<br>(Missi<br>g) | n<br>affec<br>ted | HLA DR3/4<br>Probiotic exposure |
|----------------------------------|-------------------|-------------------|---------------------------------------|-------------------|-------------------|------------------------------------|-------------------|-------------------|------------------------------------|-------------------|-------------------|---------------------------------|
|                                  |                   |                   | HR (95% CI), p*                       |                   |                   | HR (95% CI), p*                    |                   |                   | HR (95% CI), p*                    |                   |                   | HR (95% CI), p*                 |
| <b>Any solid food</b>            |                   |                   |                                       |                   |                   |                                    |                   |                   |                                    |                   |                   |                                 |
| <4 months**                      | 1424              | 111               | 0.91 (0.61, 1.37), 0.664              | 416               | 34                | 0.97 (0.51, 1.87), 0.933           | 943               | 123               | <b>1.61 (1.01, 2.56), 0.044</b>    | 249               | 36                | 0.86 (0.44, 1.67), 0.655        |
| 4-<6 months                      | 1869              | 184               | 1.05 (0.71, 1.54), 0.819              | 524               | 59                | 1.22 (0.67, 2.23), 0.522           | 1201              | 180               | <b>1.71 (1.08, 2.70), 0.021</b>    | 327               | 39                | 0.67 (0.35, 1.29), 0.234        |
| >=6 months                       | 375               | 33                | 1                                     | 120               | 15                | 1                                  | 246               | 22                | <b>1</b>                           | 76                | 14                | 1                               |
|                                  |                   |                   |                                       |                   |                   |                                    |                   |                   |                                    |                   |                   |                                 |
| <b>Cereals, any</b>              |                   |                   |                                       |                   |                   |                                    |                   |                   |                                    |                   |                   |                                 |
| <4 months                        | 890               | 65                | 0.90 (0.62, 1.32), 0.603              | 211               | 16                | 0.80 (0.42, 1.52), 0.499           | 611               | 70                | 1.24 (0.83, 1.86), 0.294           | 151               | 19                | 0.71 (0.38, 1.35), 0.300        |
| 4-<6 months                      | 2198              | 213               | 1.06 (0.76, 1.46), 0.746              | 609               | 60                | 0.96 (0.60, 1.55), 0.877           | 1387              | 215               | <b>1.50 (1.05, 2.14), 0.028</b>    | 357               | 47                | 0.76 (0.45, 1.31), 0.328        |
| >=6 months                       | 568               | 50                | 1                                     | 237               | 32                | 1                                  | 384               | 39                | <b>1</b>                           | 143               | 14                | 1                               |
|                                  | (12)              |                   |                                       | (3)               |                   |                                    | (8)               |                   |                                    | (1)               |                   |                                 |
| <b>Gluten containing cereals</b> |                   |                   |                                       |                   |                   |                                    |                   |                   |                                    |                   |                   |                                 |
| <4 months                        | 243               | 12                | <b>0.51 (0.28, 0.93), 0.029</b>       | 51                | 2                 | 0.41 (0.10, 1.70), 0.220           | 167               | 19                | 0.84 (0.51, 1.36), 0.469           | 46                | 3                 | 0.67 (0.20, 2.21), 0.512        |
| 4-<6 months                      | 1279              | 133               | 1.02 (0.79, 1.33), 0.861              | 345               | 29                | 0.80 (0.51, 1.28), 0.356           | 837               | 121               | 0.87 (0.67, 1.14), 0.309           | 220               | 39                | <b>1.64 (1.04, 2.61), 0.035</b> |
| >=6 months                       | 2075              | 182               | 1                                     | 648               | 77                | 1                                  | 1346              | 183               | <b>1</b>                           | 379               | 47                | 1                               |
|                                  | (71)              |                   |                                       | (16)              |                   |                                    | (40)              |                   |                                    | (7)               |                   |                                 |
| <b>Non-gluten cereals</b>        |                   |                   |                                       |                   |                   |                                    |                   |                   |                                    |                   |                   |                                 |
| <4 months                        | 838               | 63                | 0.90 (0.62, 1.31), 0.589              | 191               | 16                | 0.91 (0.45, 1.75), 0.786           | 577               | 65                | 1.14 (0.77, 1.66), 0.529           | 135               | 18                | 0.76 (0.40, 1.44), 0.398        |
| 4-<6 months                      | 2210              | 210               | 1.00 (0.73, 1.37), 0.986              | 620               | 60                | 0.97 (0.60, 1.58), 0.916           | 1391              | 214               | 1.38 (0.98, 1.95), 0.064           | 368               | 47                | 0.74 (0.44, 1.27), 0.278        |
| >=6 months                       | 605               | 55                | 1                                     | 245               | 32                | 1                                  | 413               | 45                | <b>1</b>                           | 148               | 24                | 1                               |
|                                  | (15)              |                   |                                       | (4)               |                   |                                    | (9)               |                   |                                    | (1)               |                   |                                 |
| <b>Fruits &amp; berries</b>      |                   |                   |                                       |                   |                   |                                    |                   |                   |                                    |                   |                   |                                 |
| <4 months                        | 794               | 51                | <b>0.69 (0.49, 0.98), 0.040</b>       | 259               | 18                | 0.71 (0.38, 1.33), 0.288           | 547               | 65                | 1.03 (0.74, 1.44), 0.844           | 143               | 19                | 1.02 (0.53, 1.98), 0.952        |
| 4-<6 months                      | 1908              | 187               | 0.94 (0.72, 1.24), 0.669              | 573               | 61                | 1.06 (0.65, 1.73), 0.827           | 1216              | 180               | 1.13 (0.85, 1.49), 0.413           | 368               | 50                | 0.97 (0.55, 1.71), 0.910        |
| >=6 months                       | 948               | 89                | 1                                     | 221               | 29                | 1                                  | 618               | 78                | <b>1</b>                           | 138               | 20                | 1                               |
|                                  | (18)              |                   |                                       | (7)               |                   |                                    | (9)               |                   |                                    | (3)               |                   |                                 |
| <b>Egg</b>                       |                   |                   |                                       |                   |                   |                                    |                   |                   |                                    |                   |                   |                                 |
| <9 months                        | 2465              | 223               | 0.97 (0.76, 1.15) 0.835               | 633               | 63                | 1.05 (0.70, 1.59), 0.817           | 1617              | 222               | 0.91 (0.72, 1.17), 0.466           | 403               | 60                | 1.36 (0.85, 2.18), 0.204        |
| >9 months                        | 997               | 94                | 1                                     | 356               | 41                | 1                                  | 666               | 98                | <b>1</b>                           | 220               | 28                | 1                               |
|                                  | (206)             |                   |                                       | (71)              |                   |                                    | (107)             |                   |                                    | (29)              |                   |                                 |

\*Adjusted for country, first degree family member with type 1 diabetes (FDR) -status, sex of the child
